# Supplementary material for: Interacting hepatic PAI-1/tPA gene regulatory pathways influence impaired fibrinolysis severity in obesity
Source: JCI journal article supplement (doi:10.1172/jci135919), 2020-07-12

## Supplemental Methods

### Materials

|                                                   |                       |                                   |
|---------------------------------------------------|-----------------------|-----------------------------------|
| Rose-Bengal                                       | Fisher Scientific     | Cat# R323-25                      |
| Sodium citrate (3.8%, w/v)                        | Fisher Scientific     | Cat# 72284                        |
| Halt™ Protease and Phosphatase Inhibitor Cocktail | Thermo Fisher         | Cat# 78444                        |
| RIPA buffer                                       | Thermo Fisher         | Cat# 89900                        |
| Halt™ Protease and Phosphatase Inhibitor Cocktail | Thermo Fisher         | Cat# 78444                        |
| Protein G magnetic beads                          | Thermo Fisher         | Cat# 88847                        |
| Supersignal West Pico ECL                         | Thermo Fisher         | Cat# 34080                        |
| RNeasy Kit                                        | Qiagen                | Cat# 74106                        |
| QIAquick PCR Purification Kit                     | Qiagen                | Cat# 28106                        |
| RNA lysis buffer                                  | Qiagen                | Cat# 79216                        |
| High-Capacity cDNA Reverse Transcription Kit      | Thermo Fisher         | Cat# 4374966                      |
| PowerUp SYBR Green Master Mix                     | Thermo Fisher         | Cat# A25777                       |
| Rabbit anti-DACH1                                 | Abcam                 | Cat# ab77234; RRID: AB_2277076    |
| Rabbit anti-DACH1                                 | Proteintech           | Cat# 10914-1-AP; RRID: AB_2230330 |
| Rabbit anti-Rev-Erba                              | Cell Signaling        | Cat# 13418; RRID:AB_2630359       |
| Rabbit anti-pCREB1                                | Cell Signaling        | Cat# 9198; RRID:AB_2561044        |
| Rabbit anti-CREB1                                 | Cell Signaling        | Cat# 9197; RRID:AB_331277         |
| Rabbit anti-PAI1                                  | Abcam                 | Cat# ab66705; RRID:AB_1310540     |
| Rabbit anti-GAPDH                                 | Cell Signaling        | Cat# 8884; RRID:AB_11129865       |
| Rabbit anti-ACTB (β-actin)                        | Cell Signaling        | Cat# 5125; RRID: AB_1903890       |
| Rabbit normal IgG                                 | Santa Cruz            | Cat# sc-2025; RRID: AB_737182     |
| Rabbit anti-HA                                    | Santa Cruz            | Cat# sc-7392; RRID: AB_627809     |
| Rabbit anti-mouse tPA                             | Molecular Innovations | Cat# ASMTPA-GF-HT                 |
| Mouse anti-human tPA                              | Molecular Innovations | Cat# ASHTPA-GF-HT                 |
| Kinetic tPA activity kit                          | Abcam                 | Cat# ab108905                     |
| Mouse total tPA antigen ELISA                     | Molecular Innovations | Cat# MTPAKT-TOT                   |

|                                       |                       |                     |
|---------------------------------------|-----------------------|---------------------|
| Mouse total PAI-1 antigen ELISA       | Molecular Innovations | Cat# MPAIKT-TOT     |
| Mouse total A2AP antigen ELISA        | Molecular Innovations | Cat# MA2APKT-TOT    |
| Human total tPA antigen ELISA         | Molecular Innovations | Cat# HTPAKT-TOT     |
| Human PAI1                            | Molecular Innovations | Cat# CPAI           |
| Human PAI1, no LRP1 binding           | Molecular Innovations | Cat# HPAI-R76E-I91L |
| H89 dihydrochloride, Kinase inhibitor | Calbiochem            | Cat# 371962         |

**Real-time quantitative-PCR.** Total RNA was extracted from whole tissues or primary cells using the RNeasy Kit™ (Qiagen, 74106). cDNA was synthesized from 1 µg total RNA using the High-Capacity cDNA Reverse Transcription Kit™ (Thermo Fisher, #4374966). Real-time quantitative PCR (qPCR) was carried out using a 7500 Real-Time PCR system (Applied Biosystems) and PowerUp™ SYBR Green Master Mix (Thermo Fisher, #A25777). The sequences of the gene-specific primers used for the qPCR assays are listed in **Supplemental Table 3**. Fold changes in mRNA levels relative to a control condition were determined after normalization to the level of *Rplp0* mRNA.

**Immunoblotting.** Proteins from tissue or cell lysates were electrophoresed on 4-20% Tris-glycine gradient SDS gels and then transferred to nitrocellulose membranes. The membranes were blocked using either 5% non-fat milk or 5% BSA, followed by incubation with primary antibodies overnight. Blots were then washed thoroughly and probed with HRP-conjugated secondary antibodies for 1 hour. The protein bands were detected with Supersignal West Pico enhanced chemiluminescent (ECL) solution (Thermo Scientific, Cat. No. 34080). The densitometry of immunoblots was analyzed by Quantity One™ (Bio-Rad Laboratories).

**Mouse liver nuclei preparation and ChIP assays.** Mouse liver tissues were homogenized using a Dounce homogenizer (Wheaton, Cat#357544) with a loose pestle in 1:10 (w:v) of ice-cold NP-40 lysis buffer supplemented with protease inhibitor cocktail.

The liberation of nuclei was monitored by DAPI staining and fluorescence microscopy. To purify the intact nuclei, lysates were then layered over 1M (bottom) and 0.68M (top) of sucrose and spun at 4000 rpm for 30 min at 4°C. Following a washing step, nuclear pellets were cross-linked with 1% fresh formaldehyde in PBS for 10 min at room temperature. Cross-linking was terminated by adding 200mM Tris-HCl (pH 9.4) and 1mM DTT for 10 min and centrifuged at 2500 rpm for 15 min at 4°C. Nuclear pellets were suspended in SDS lysis buffer containing protease inhibitors, incubated for 10 min on ice, and sheared DNA in a cold water bath in a focused-ultrasonicator (Covaris, S2) to obtain DNA fragments with an average size of 500 bps. Fragmented chromatin was pre-cleaned by incubating with normal rabbit IgG for 1 hr at 4 °C, followed by 1 hr of incubation with 50 µL protein G magnetic beads (Pierce, Cat# 88847) at 4 °C with rotation. A rabbit anti-CREB1 antibody (Cat#9197) was used to pull down CREB1-binding complexes, and a control rabbit anti-HA antibody was used to pull down non-specific binding complexes. Immunoprecipitated chromatin fragments were reverse cross-linked, digested by proteinase K, and purified using QIAquick PCR Purification Kit (Qiagen, Cat# 28106). The presence of CREB1 in the *Plat* exonic region was quantified by qPCR and expressed relative to the input genomic DNA. The sequences of primers used for the ChIP-qPCR assays are described in **Supplemental Table 4**.

**Table S1. Clinical characteristics of subjects whose specimens were assayed for plasma and liver PAI1 protein, liver *SERPINE1* and *PLAT* mRNA, and WAT *SERPINE1* mRNA in Figure 1E, 3D, and Figure S3C.**

| #  | BMI   | Age | Gender | Diagnosis                                                                                           | Surgery                                                  | Medications                                                                                                                                  |
|----|-------|-----|--------|-----------------------------------------------------------------------------------------------------|----------------------------------------------------------|----------------------------------------------------------------------------------------------------------------------------------------------|
| 1  | 19.33 | 57  | Female | Incisional hernia                                                                                   | Laparoscopic incisional hernia repair                    | Breoellipta inhalation, Creon 36000u, Nystatin 10000u/ml mouth/throat suspension, pantoprazole 40mg, ursodiol 300mg, ventolin HFA inhalation |
| 2  | 22.66 | 66  | Female | Cholelithiasis, moderate intrahepatic biliary dilatation                                            | Laparoscopic cholecystectomy                             | Bupropion, Climara, Progesterone                                                                                                             |
| 3  | 22.76 | 71  | Male   | Colon cancer, impacted gallbladder                                                                  | Lap right colectomy, lap cholecystectomy                 | Flagyl, polyethylene glycol, neomycin                                                                                                        |
| 4  | 25.99 | 78  | Female | Gallbladder polyps & Cholelithiasis                                                                 | Laparoscopic cholecystectomy                             | Prednisolone acetate 1% ophthalmic suspension, restasis 0.05% ophthalmic emulsion, synthroid citalopram                                      |
| 5  | 27.12 | 37  | Female | Gallbladder polyps, mild hepatic steatosis                                                          | Laparoscopic cholecystectomy                             | Amoxicillin/ Clavulanate                                                                                                                     |
| 6  | 27.83 | 31  | Female | Cholelithiasis                                                                                      | Laparoscopic cholecystectomy                             | Albuterol sulfate NEBU, Colace CAPS, Cryselle, Iron Supplement, Prenatal Vitamins                                                            |
| 7  | 32.48 | 30  | Female | Cholelithiasis, suspected hepatic steatosis                                                         | cholecystectomy                                          |                                                                                                                                              |
| 8  | 32.6  | 68  | Female | Cholelithiasis                                                                                      | Lap cholecystectomy with intraoperative cholangiogram    | Prozac 40mg (fluoxetine)                                                                                                                     |
| 9  | 35    | 46  | Female | morbid obesity, hepatic steatosis, hepatomegaly                                                     | Laparoscopic sleeve gastrectomy                          | HCT2, Losartan, Metoprolol                                                                                                                   |
| 10 | 36.2  | 47  | Male   | Cholelithiasis                                                                                      | Laparoscopic cholecystectomy                             | Was on lipno and netronicb2ob for 14 days, 10 days before surgery                                                                            |
| 11 | 36.47 | 25  | Female | Morbid obesity, pre-diabetes                                                                        | Laparoscopic gastrectomy sleeve                          | Levothyroxine sodium 100mcg, metoprolol 25mg, niferex, vitD 50000u 1 capsule weekly, ferrous sulphate                                        |
| 12 | 36.7  | 67  | Male   | Morbid Obesity, symptomatic cholelithiasis, s/p lap Band, liver fatty infiltration, type 2 diabetes | Lap Sleeve Gastrectomy, removal of band, cholecystectomy | Metformin, Simvastatin, ASA 81mg, Hydroxychloroquine, Lipitor, Symbicort.                                                                    |
| 13 | 38.49 | 57  | Female | Morbid obesity, type 2 diabetes                                                                     | Gastric bypass, removal of gastric band                  | Aspirin 81mg, Baclofen 10mg, Topiramate, Toradol intramuscular (im), Trazodone,                                                              |

|    |       |    |        |                                                                                                      |                                                           |                                                                                                                                                                  |
|----|-------|----|--------|------------------------------------------------------------------------------------------------------|-----------------------------------------------------------|------------------------------------------------------------------------------------------------------------------------------------------------------------------|
|    |       |    |        |                                                                                                      |                                                           | Klonopin, Valacyclovir, Albuterol, Keppra, Metformin, Xyzal, Dihydroergotamine, Thorazine                                                                        |
| 14 | 40.62 | 44 | Female | Morbid obesity                                                                                       | Laparoscopic gastric bypass                               | Aripiprazole, Calcium citrate, Lorazepam, wellbutrin XL150mg, zoloft, zyrtec                                                                                     |
| 15 | 41.94 | 43 | Female | Morbid obesity, hepatic steatosis, hepatomegaly                                                      | Laparoscopic sleeve gastrectomy                           | atorvastatin, metformin, vitD 50000u                                                                                                                             |
| 16 | 42    | 50 | Female | morbid obesity, hepatic steatosis                                                                    | Laparoscopic sleeve gastrectomy                           | Enalapril, Fluoxetine, Bupropion, Ibuprofen                                                                                                                      |
| 17 | 43.91 | 55 | Female | Morbid obesity, Steatohepatitis, with moderate necroinflammatory activity, no fibrosis, pre-diabetes | Laparoscopic gastrectomy Sleeve & repair of hiatal hernia | Allegra, Meclizine, VitD                                                                                                                                         |
| 18 | 44.45 | 24 | Female | Morbid obesity                                                                                       | Laparoscopic sleeve gastrectomy, Hiatal hernia repair     | vitD 50000u                                                                                                                                                      |
| 19 | 44.48 | 26 | Male   | Morbid obesity                                                                                       | Laparoscopic sleeve gastrectomy                           | Lamotrigine, Intuniv                                                                                                                                             |
| 20 | 45.48 | 54 | Male   | Morbid obesity, type 2 diabetes                                                                      | Laparoscopic sleeve gastrectomy                           | Edarbyclor, Furosemide 40mg, Lantus 100u/mL, Metformin 1000mg, Metoprolol succinate ER 25mg s/c, Novolog 100u/ml s/c, Pantoprazole, Strovite, Valacyclovir, VitD |
| 21 | 45.66 | 58 | Female | Obesity, type 2 diabetes                                                                             | Lap Gastric Bypass                                        | Amphetamine-dextroamphetamine, bupropion Hcl ER (XL), Furosemide, Ondansetron, Pravachol 40mg, Synthroid, VitD, Valsartan, Metformin, Aspirin                    |
| 22 | 45.73 | 25 | Female | Morbid obesity, moderate hiatal hernia                                                               | Laparoscopic sleeve gastrectomy, Hiatal hernia repair     | MultiVit, Ca2++                                                                                                                                                  |
| 23 | 48.3  | 52 | Female | Morbid obesity, hepatic steatosis, type 2 diabetes                                                   | Laparoscopic Gastric Bypass                               | Omeprazole, Lisinopril, Singulair, Proventil HFA, Atorvastatin, Chlorthalidone, Advair Diskus, Topiramate                                                        |
| 24 | 50.32 | 28 | Male   | Morbid obesity, hepatic steatosis, type 2 diabetes                                                   | Lap Gastrectomy Sleeve                                    | Aspirin 81mg, calcium, Levetiracetam, Lisinopril, Metformin, Vitamin D.                                                                                          |
| 25 | 59.02 | 34 | Male   | Morbid obesity, mild steatosis, predominantly large droplet fat, no increase in fibrosis             | Laparoscopic sleeve gastrectomy                           | Omeprazole, VitD                                                                                                                                                 |

**Table S2. Clinical characteristics of subjects whose livers were assayed for liver DACH1 protein and plasma tPA activity in Figure 2B, left and middle panels**

| #  | BMI  | Liver DACH1/ $\beta$ -actin | Diagnosis of diabetes | Medication for diabetes |
|----|------|-----------------------------|-----------------------|-------------------------|
| 1  | 18.7 | 1.0                         | No                    | No                      |
| 2  | 19.7 | 1.6                         | No                    | No                      |
| 3  | 20.7 | 3.6                         | No                    | No                      |
| 4  | 21.9 | 8.8                         | No                    | No                      |
| 5  | 24.3 | 5.6                         | Yes                   | No                      |
| 6  | 26.8 | 3.2                         | No                    | No                      |
| 7  | 29.4 | 3.2                         | No                    | No                      |
| 8  | 29.5 | 9.3                         | No                    | No                      |
| 9  | 30.3 | 9.4                         | No                    | No                      |
| 10 | 37   | 5.0                         | Yes                   | Sitagliptin             |
| 11 | 51.6 | 8.9                         | No                    | No                      |
| 12 | 52.5 | 13.8                        | Yes                   | Insulin                 |
| 13 | 53   | 15.1                        | Prediabetic           | Metformin               |
| 14 | 62   | 19.4                        | Yes                   | Metformin               |

**Table S3. qPCR primers for mRNA assays.**

| #  | Genomic region  | Direction | 5'- Sequence -3'        | Organism |
|----|-----------------|-----------|-------------------------|----------|
| 1  | <i>Rplp0</i>    | forward   | GCTCCAAGCAGATGCAGCA     | mouse    |
| 2  | <i>Rplp0</i>    | reverse   | CCGGATGTGAGGCAGCAG      | mouse    |
| 3  | <i>Plat</i>     | forward   | AGCACTCTCGGGACACAGAA    | mouse    |
| 4  | <i>Plat</i>     | reverse   | GTCTGCGTTGGCTCATCTCT    | mouse    |
| 5  | <i>Serpine1</i> | forward   | CAATGGAAGGGCAACATGACC   | mouse    |
| 6  | <i>Serpine1</i> | reverse   | AGCTGCTCTTGGTCGGAAA     | mouse    |
| 7  | <i>Nr1d1</i>    | forward   | ctactggctccctcaccagga   | mouse    |
| 8  | <i>Nr1d1</i>    | reverse   | gacactcggctgctgtctcca   | mouse    |
| 9  | <i>Creb1</i>    | forward   | ATCTGGAGCAGACAACCAGC    | mouse    |
| 10 | <i>Creb1</i>    | reverse   | GGCATGGATACCTGGGCTAA    | mouse    |
| 11 | <i>Lrp1</i>     | forward   | atcaactggcgggtgacaa     | mouse    |
| 12 | <i>Lrp1</i>     | reverse   | ggctctgtagcctgggtggt    | mouse    |
| 13 | <i>RPLP0</i>    | forward   | CGTCCTCGTGGAAGTGACAT    | human    |
| 14 | <i>RPLP0</i>    | reverse   | CTTGGAGCCCACATTGTCTG    | human    |
| 15 | <i>PLAT</i>     | forward   | gtttcgcccagccaggaaat    | human    |
| 16 | <i>PLAT</i>     | reverse   | tattccacccggttgcttct    | human    |
| 17 | <i>SERPINE1</i> | forward   | GCGCTGCAGAAAGTGAAGAT    | human    |
| 18 | <i>SERPINE1</i> | reverse   | AAGGACTGTTCTGTGGGGT     | human    |
| 19 | <i>NR1D1</i>    | forward   | TCATGCTTGCGAAGGCTGTA    | human    |
| 20 | <i>NR1D1</i>    | reverse   | CGACCAAACCGAACAGCATC    | human    |
| 21 | <i>CREB1</i>    | forward   | GTGACGGAGGAGCTTGTACC    | human    |
| 22 | <i>CREB1</i>    | reverse   | CTGGCATAGATACCTGGGCT    | human    |
| 23 | <i>LRP1</i>     | forward   | GAGTCCAATGCCACTTGTTTCA  | human    |
| 24 | <i>LRP1</i>     | reverse   | CAGTCATTGTCATTGTCGCATCT | human    |

**Table S4. ChIP-qPCR primers**

| # | Genomic region                                   | Direction | 5'- Sequence -3'     | Organism |
|---|--------------------------------------------------|-----------|----------------------|----------|
| 1 | CREB1 consensus sequence in <i>Plat</i> promoter | forward   | GCACCAAAAGTCATGTGCGT | mouse    |
| 2 | CREB1 consensus sequence in <i>Plat</i> promoter | reverse   | GCAACTACCCCTCAGGACAC | mouse    |
| 3 | Rplp0 promoter                                   | forward   | ACTAATCGGGGGTGCAAAC  | mouse    |
| 4 | Rplp0 promoter                                   | reverse   | CTGTGATGCACAGGCAGTAT | mouse    |



## Supplemental Figure Legends

**Supplemental Figure 1. Diet-induced obese mice have increased plasma tPA, reduced plasma tPA activity, delayed clot lysis time and shortened time to arterial thrombotic occlusion.** (A-C) Chow-fed mice (Lean) or diet-induced obese mice were assayed for the following parameters: (A) Plasma tPA protein concentration, plasma tPA activity, plasma fibrinolytic activity measured by the euglobulin clot lysis assay, and time to occlusive carotid arterial thrombosis induced by rose bengal-laser photochemical injury; (B) Plasma PAI-1 protein concentration; and (C) liver *Plat* mRNA levels and liver tPA activity. Horizontal lines in dot-density plots indicate mean values. Asterisks represent statistical significance at  $**P < 0.01$  using two-tailed Student's *t*-test ( $n = 8-10$  mice per group). (D) *Plat* mRNA levels in the liver and endothelial layer of descending aortic artery from lean and obese WT mice. Asterisks represent statistical significance of  $*P < 0.05$ , and n.s. indicates non-significance ( $P > 0.05$ ), using two-tailed Student's *t*-test ( $n = 3$  mice per group). (E) PAI-1 concentration in the plasma of the three groups of mice in Figure 1A-C. Asterisks represent statistical significance of  $*P < 0.05$  or  $**P < 0.01$ , and n.s. indicates non-significance ( $P > 0.05$ ), using one-way analysis of variance followed by Tukey's test ( $n = 9-10$  mice per group). (F) A2AP concentration in the plasma of hepatocyte tPA-silenced obese mice (shPlat) and control AAV8-H1-Scr-treated obese mice (Ctrl); n.s. indicates non-significance ( $P > 0.05$ ) using two-tailed Student's *t*-test ( $n = 9$  mice per group). (G) *Serpine1* mRNA levels in the livers from lean and obese WT mice. The asterisk represents statistical significance of  $**P < 0.01$ , using two-tailed Student's *t*-test ( $n = 10$  mice per group). (H) PAI-1 protein levels in lysates of liver and visceral white adipose tissue (WAT) from lean and obese WT mice were measured by immunoblot, with GAPDH serving as the loading control ( $n = 3$  mice per group). (I) A2AP concentration in the plasma of the two groups of mice in Figure 1F-I; n.s. indicates non-significance ( $P > 0.05$ ) using two-tailed Student's *t*-test ( $n = 11$  mice per group).

**Supplemental Figure 2. Increased DACH1 protein in the livers of obese mice, and documentation of DACH1 depletion in the livers of *Dach1fl/fl* mice treated with**

**AAV8-TBG-Cre.** (A) Immunoblot of DACH1 in the livers of lean and obese WT mice (n = 9-10 mice per group). (B) Immunoblot of DACH1 in the livers (n = 4 mice per group), and (C) plasma PAI-1 protein concentration of the 3 groups of obese *Dach1<sup>fl/fl</sup>* mice from Figure 2A, which were treated with combinations of AAV8-TBG-Cre versus AAV8-TBG-LacZ control virus and AAV8-H1-shPlat versus AAV8 control virus (Ctrl) (n = 5-7 mice per group). (D) Liver specimens from 19 wild-type mice with a wide range of body weight (lean and obese) were assayed for DACH1:β-actin densitometric ratio on immunoblot, and their plasma and liver lysate were assayed for tPA activity. The graphs show plots of the indicated correlations, which were analyzed by linear regression, with  $r^2$  and  $P$  values indicated in the graph.

**Supplemental Figure 3. The cell autonomous PAI-1 → PLAT pathway is conserved in primary mouse hepatocytes, and PAI-1 immunoblot in the livers of the human subjects analyzed in Figure 3D.** (A) Primary mouse hepatocytes were treated for 16 hours with 100 μM palmitate in BSA solution, or BSA solution control. The cells were assayed for *Plat* and *Serpine1* mRNA, and the media were assayed for tPA and PAI-1 protein concentration. (B) Mouse primary hepatocytes were transfected with si-Serpine1 or scrambled control (Scr). After 24 hours, the cells were treated with 100 μM palmitate for an additional 16 hours and then assayed for *Plat* and *Serpine1* mRNA. In A and B, results are shown as mean ± SEM. Asterisks represent statistical significance at \* $P$  < 0.05 or \*\* $P$  < 0.01 using two-tailed Student's *t*-test (n = 3 sets of cells per group). (C) Immunoblot of PAI-1 in the livers of the 25 human subjects analyzed in Figure 3D and described in Table S1.

**Supplemental Figure 4. Further characterization of the mice treated with AAV8-TBG-Nr1d1 or control AAV8 in Figure 4C.** Lean and obese mice were injected intravenously with AAV8-TBG-Nr1d1 or AAV8-TBG-LacZ control (LacZ), as indicated. After 4 weeks, the following parameters were measured: (A) Liver *Nr1d1* mRNA by qPCR (n = 10 mice per group) and Rev-Erba protein by immunoblot (n = 4 mice per group); and (B) Plasma PAI-1 protein, plasma tPA activity, and plasma fibrinolytic activity assayed by the euglobulin clot lysis assay. Horizontal lines in the dot-density

plots indicate mean values. Asterisks represent statistical significance of  $*P < 0.05$  or  $**P < 0.01$ , and n.s. indicates non-significance ( $P > 0.05$ ), using a one-way analysis of variance followed by Tukey's test ( $n = 10$  mice per group). **(C)** Human primary hepatocytes were transfected with scrambled RNA control (Scr), siNR1D1, siSERPINE1, or both siRNAs. After 24 hours, the cells were treated with 100  $\mu$ M palmitate for 16 hours and then assayed for *SERPINE1*, *PLAT*, and *NR1D1* mRNA. Results are shown as mean  $\pm$  SEM. The asterisk represents statistical significance at  $*P < 0.05$ , and n.s. indicates non-significance ( $P > 0.05$ ), using one-way analysis of variance followed by Tukey's test ( $n = 3$  sets of cells per group).

**Supplemental Figure 5. Documentation of *CREB1* silencing in the human hepatocytes analyzed in Figure 5D-E; conservation of the PAI-1-CREB-Plat pathway in primary mouse hepatocytes; and ChIP control for Figure 5F. (A)**

Immunoblots of DACH1 in the livers of obese *Serpine1<sup>fl/fl</sup>* mice from Figure 1E-H. For the left blot, obese mice were treated with AAV8-TBG-LacZ or AAV8-TBG-Cre, ( $n = 5$  mice per group, left panel). For the right blot, the livers from lean and obese mice were injected intravenously with AAV8-TBG-Nr1d1 or AAV8-TBG-LacZ control (LacZ) ( $n = 4$  mice per group, right panel). **(B)** Human primary hepatocytes were transfected with siCREB1 or scrambled control. After 24 hours, the cells were treated for 8 hours with 1  $\mu$ g active recombinant PAI-1 (rPAI-1) per mL culture medium or vehicle control (Veh). The cells were then assayed for *CREB1* mRNA. **(C)** Mouse primary hepatocytes were transfected with siCreb1 or scrambled control (Scr). After 24 hours, the cells were treated for 8 hours with 1  $\mu$ g recombinant PAI-1 (rPAI-1) per mL culture medium or vehicle control (Veh). The cells were then assayed for *Plat* and *Creb1* mRNA. For A and B, the results are shown as mean  $\pm$  SEM. Asterisks represent statistical significance of  $*P < 0.05$ , and n.s. indicates non-significance ( $P > 0.05$ ), using a one-way analysis of variance followed by Tukey's test ( $n = 3$  sets of cells per group). **(D)** Nuclear extracts from the livers of lean or obese mice were subjected to ChIP assay using anti-CREB1 or control IgG, as in Figure 5F. The Rplp0 promoter region was amplified by qPCR and normalized to the values obtained from input DNA. Results are shown as mean  $\pm$  SEM; n.s. indicates non-significance ( $P > 0.05$ ) using one-way analysis of variance followed

by Tukey's test ( $n = 3$  mice per group). (E) Plasma samples from control and Cre-treated *Creb1<sup>fl/fl</sup>* mice from Figure 6 were assayed for PAI-1 concentration. Horizontal lines in dot-density plots indicate mean values; n.s. indicates non-significance ( $P > 0.05$ ) using two-tailed Student's *t*-test ( $n = 8-9$  mice per group). (F) Plasma samples from the 3 groups of mice in Figure 7C were assayed for PAI-1 concentration. Asterisks represent statistical significance at  $**P < 0.01$  and n.s. indicates non-significance ( $P > 0.05$ ) using one-way analysis of variance followed by Tukey's test ( $n = 5$  mice per group).

**Supplemental Figure 6. Documentation of mouse body weight gain for all in vivo cohorts in the manuscript.** (A) The change of body weight of individual mice from the time of AAV8 vector injection (open circles) to the time of euthanasia (solid black dots). (B) The body weight gain of each mouse was calculated as the difference in the body weight from the time of AAV8 vector injection to the time of euthanasia.

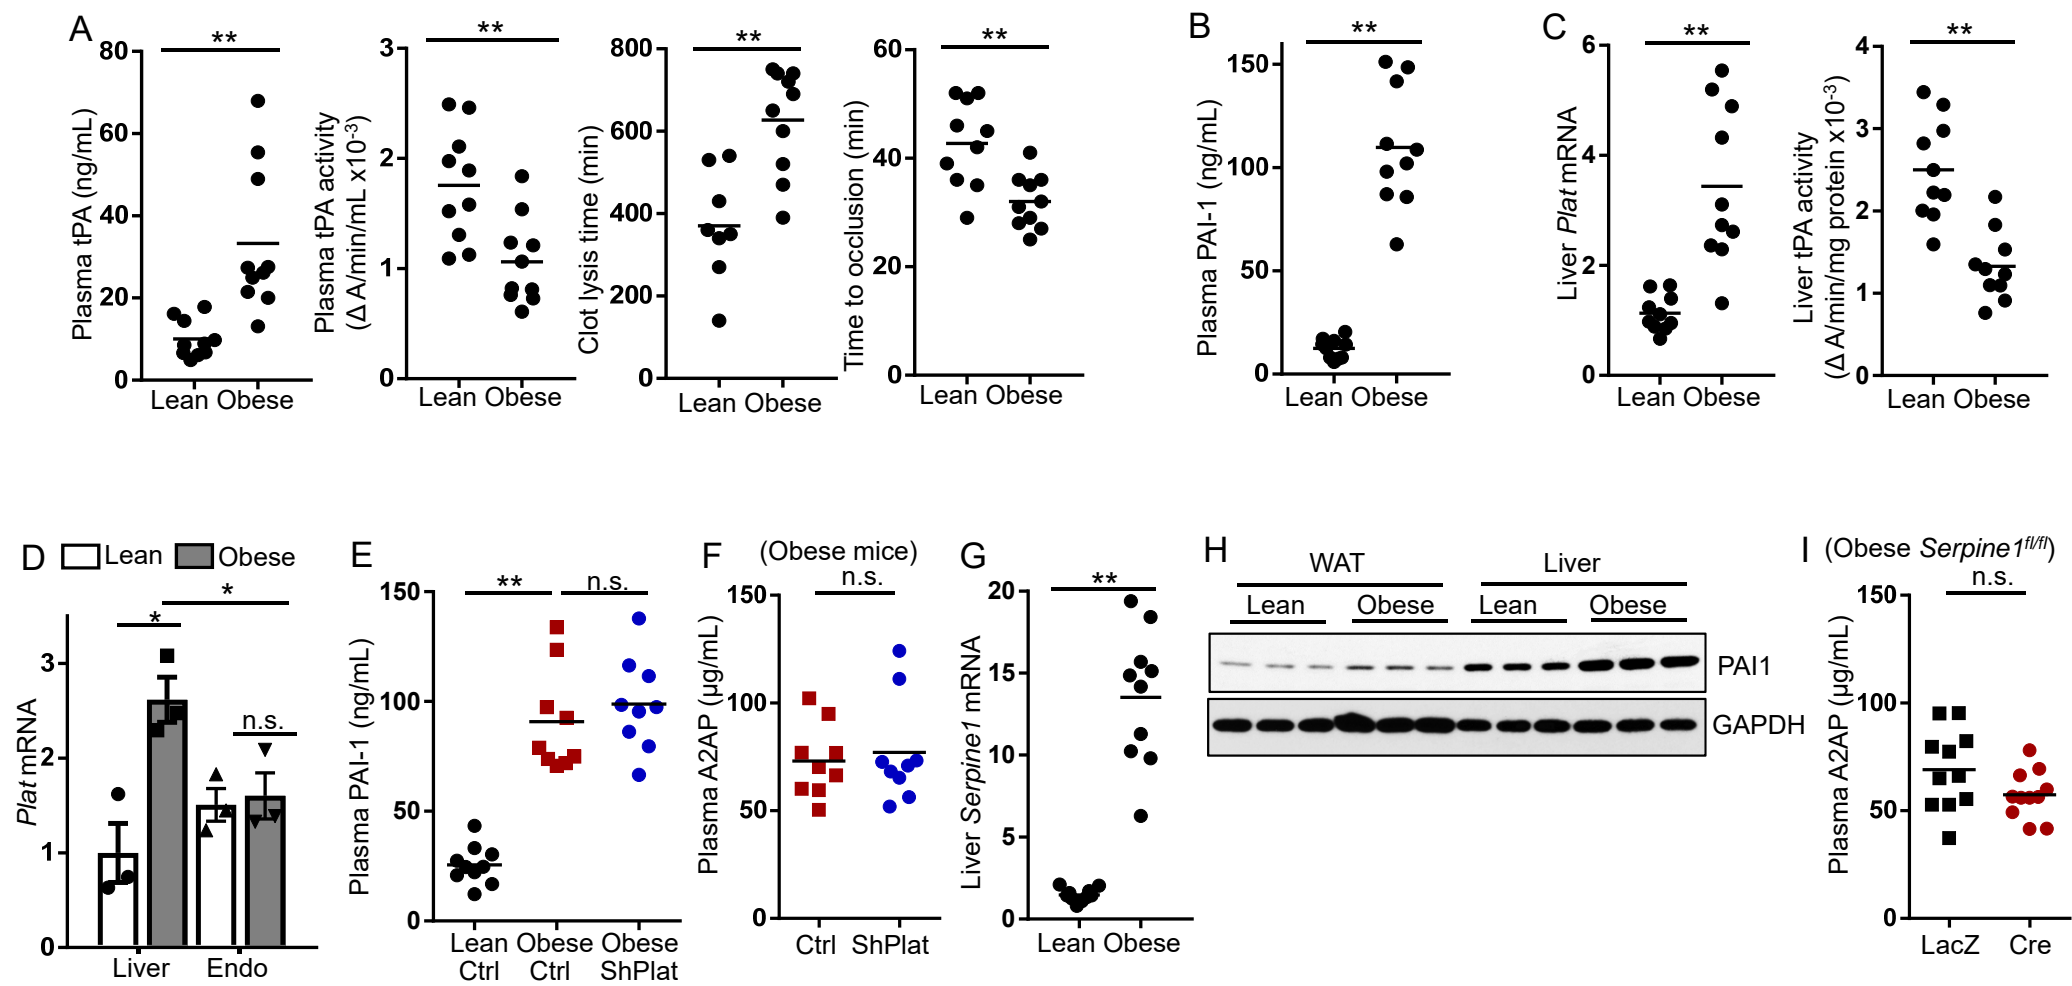

Supplemental Figure 1

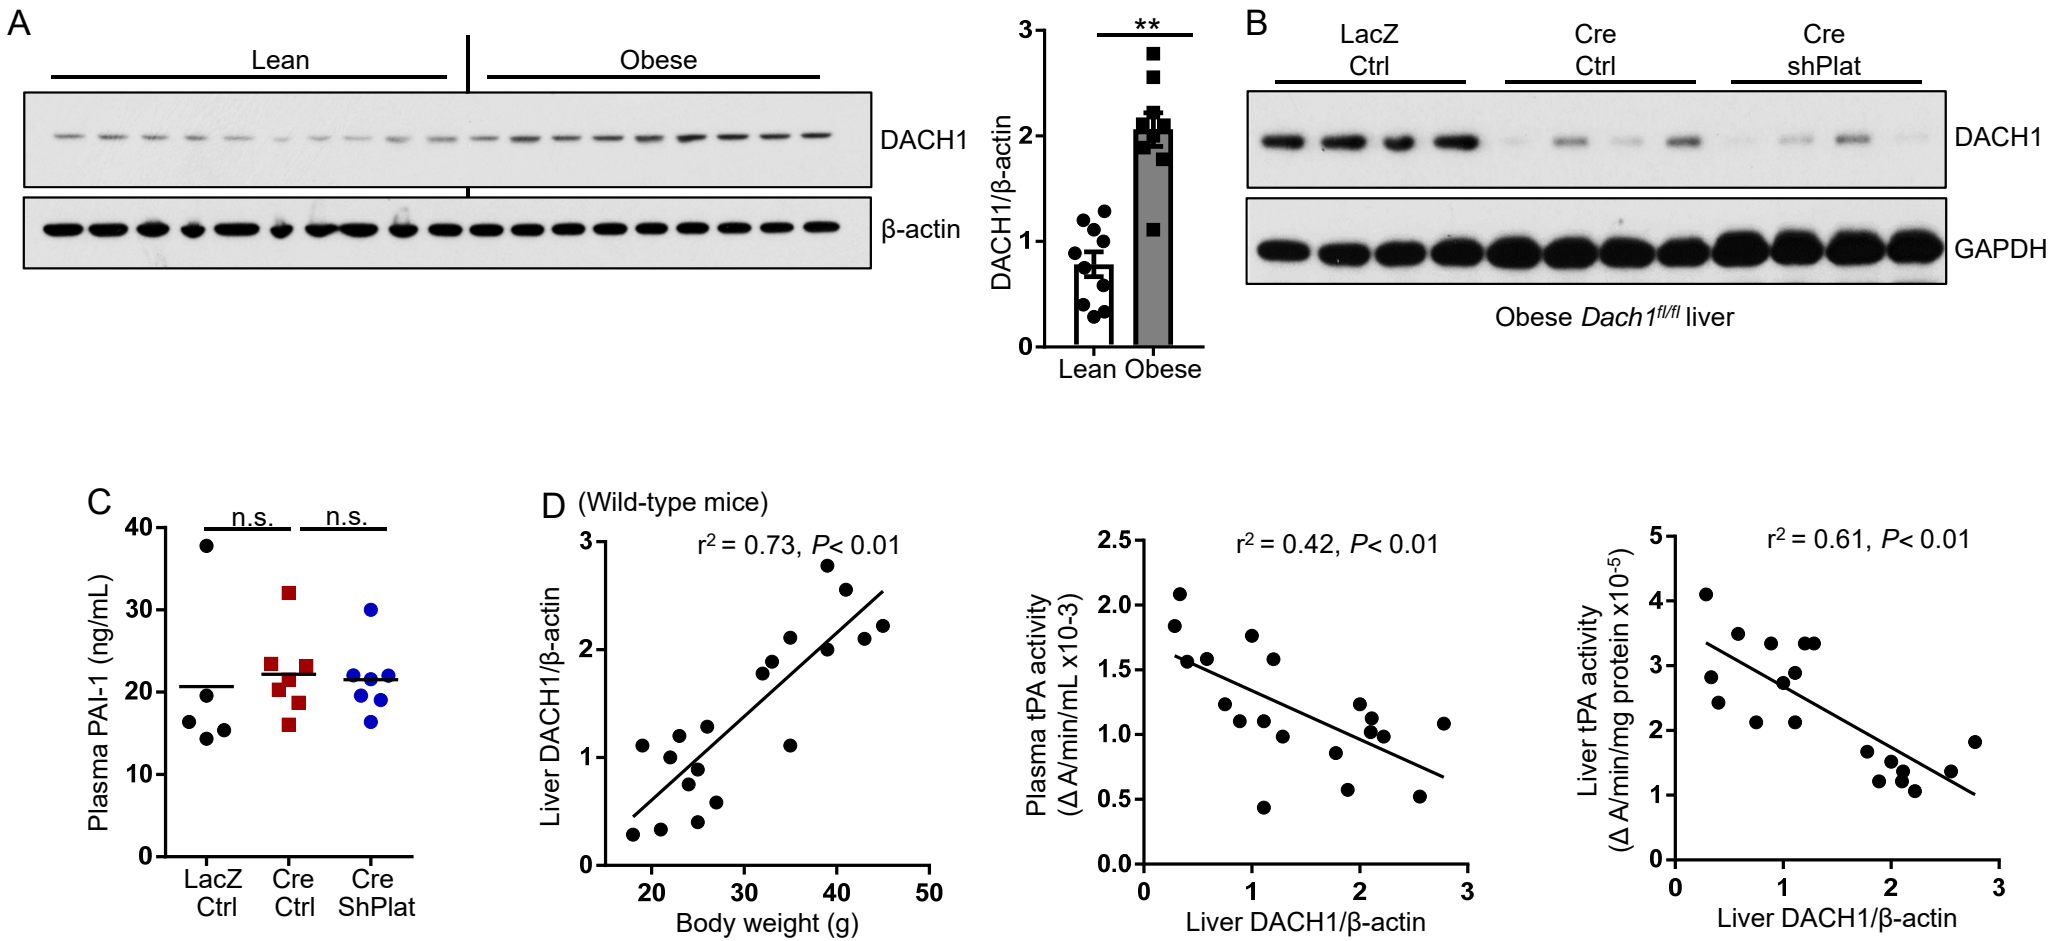

Supplemental Figure 2

A (Primary mouse hepatocytes)

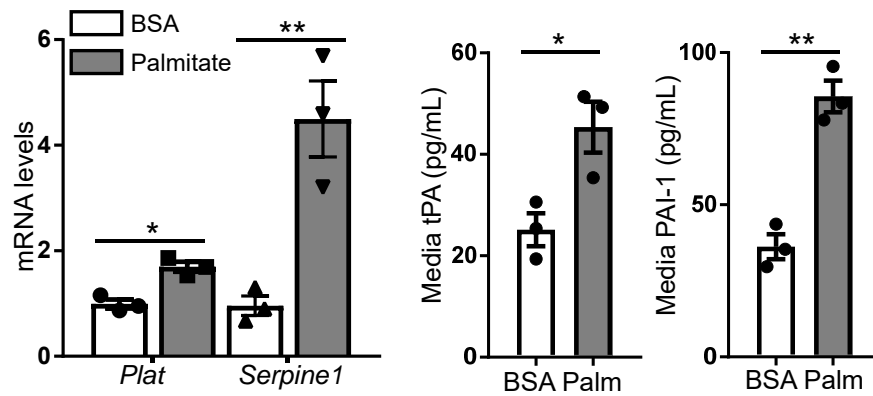

B (Primary mouse hepatocytes)

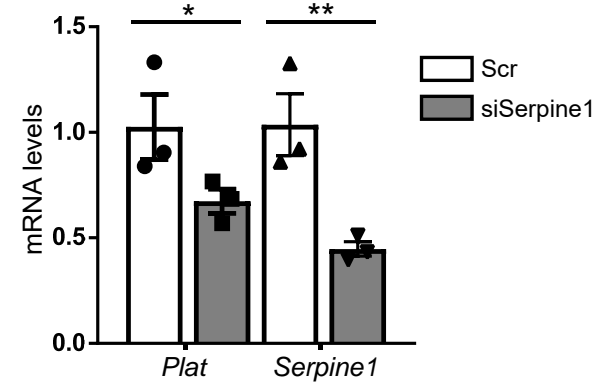

C (Human liver samples)

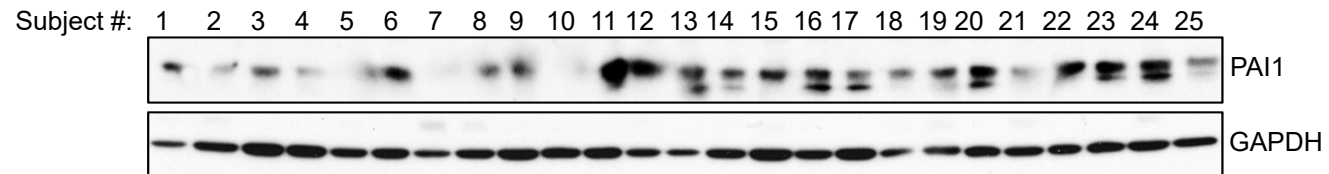

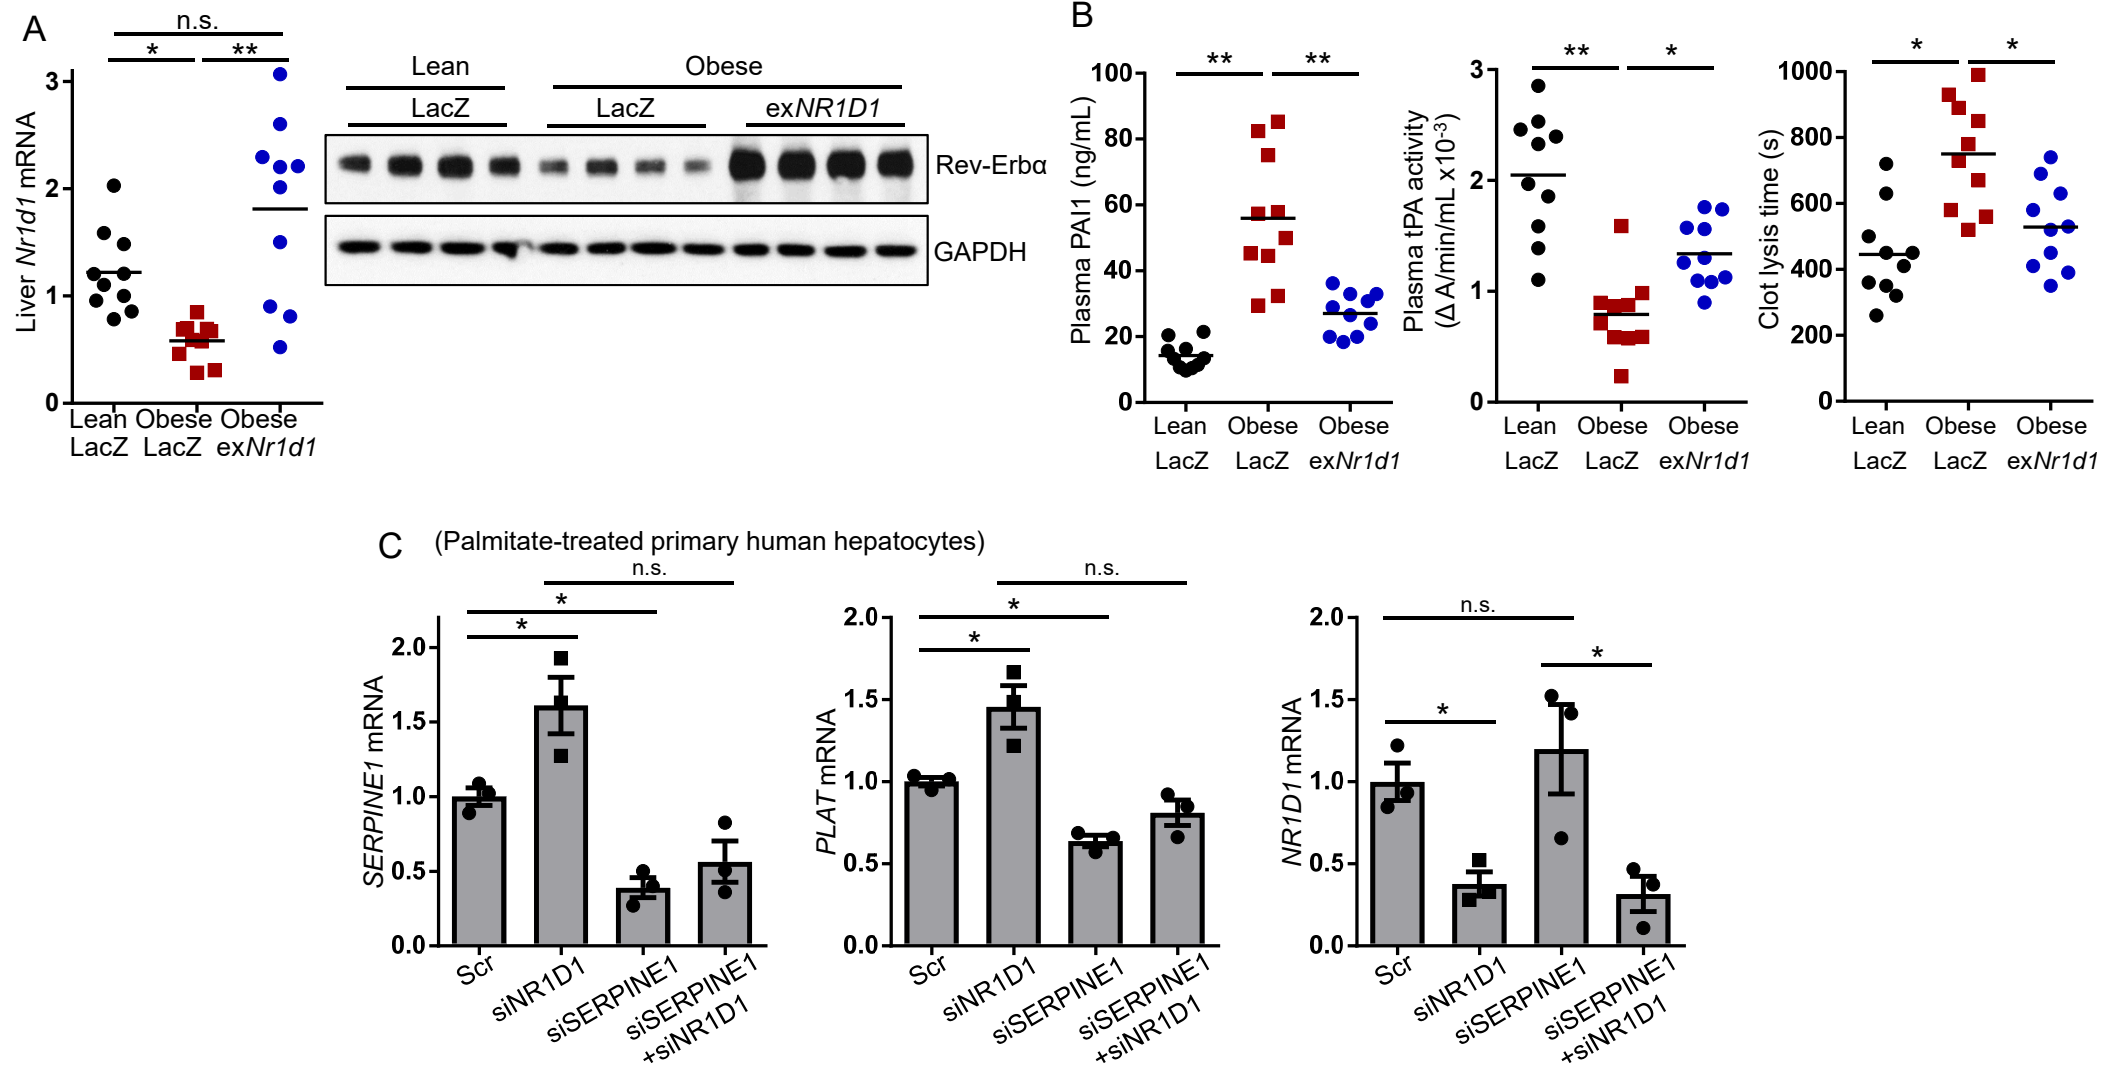

Supplemental Figure 4



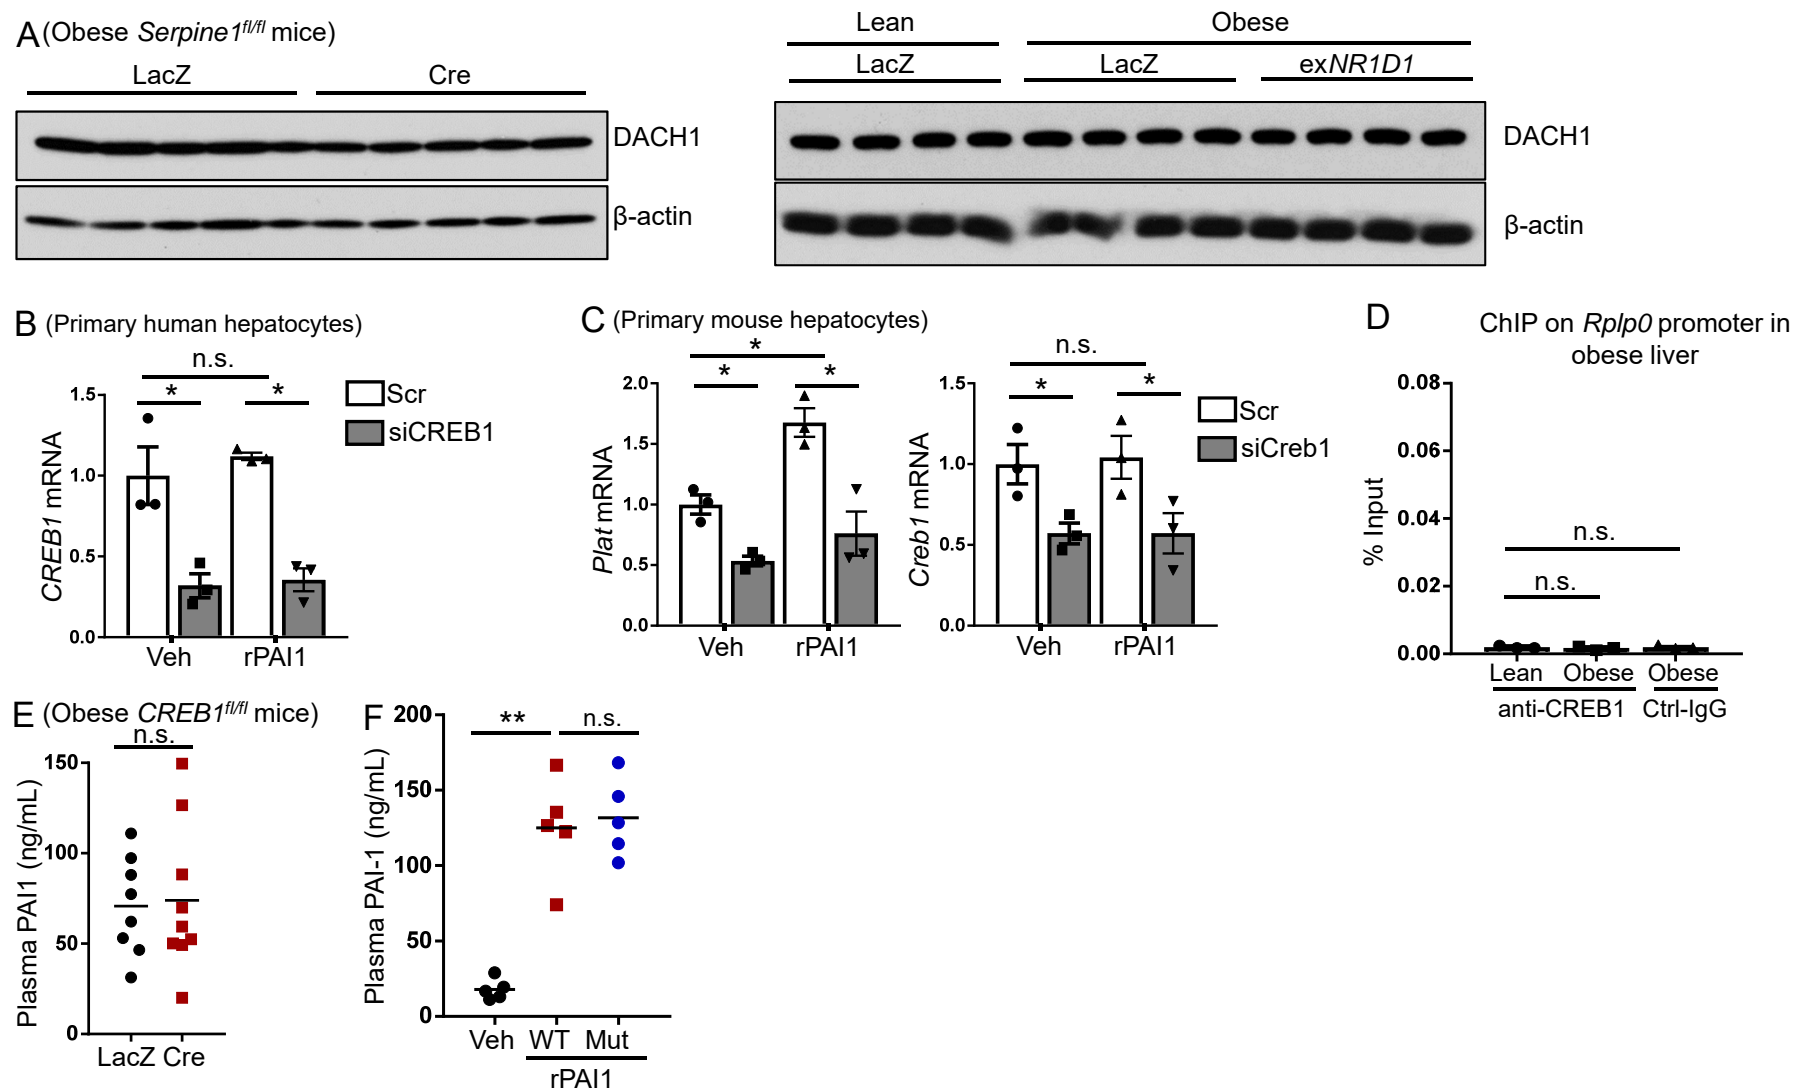

Supplemental Figure 5

## A (Change of body weight)

- At the time of PBS or AAV8 injection
- At the time of euthanasia (~5 weeks after AAV8 injection)

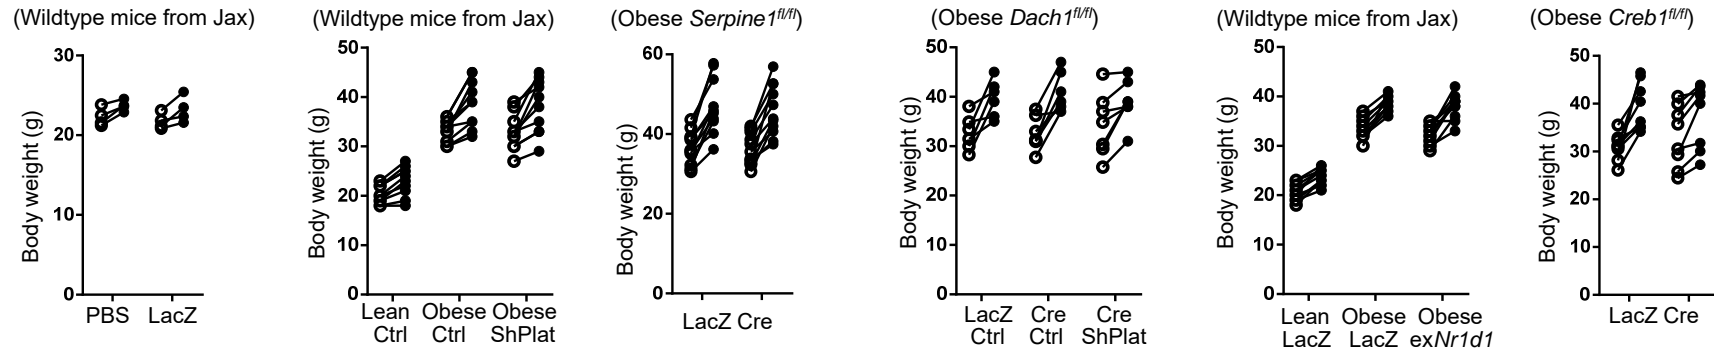

## B (Weight gain)

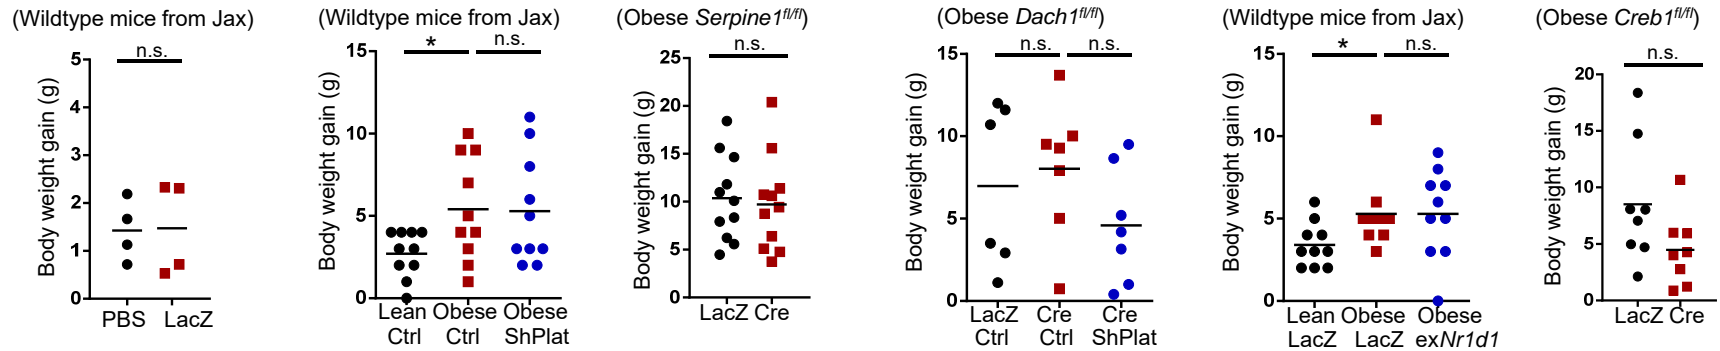

Supplement: sd1 [file 1]
